# Supplementary material for: Multiple motifs regulate apical sorting of p75 via a mechanism that involves dimerization and higher-order oligomerization
Source: PubMed Central journal article supplement — Mol Biol Cell. 2013 Jun 15;24(12):1996–2007. doi: 10.1091/mbc.E13-02-0078 (PMC3681702; doi:10.1091/mbc.e13-02-0078), 2013-06-15

# Supplemental Materials

## Molecular Biology of the Cell

Youker et al.

### Supplementary Table I – Primers used in cloning and mutagenesis

Primers for overlap extension PCR<sup>1,2</sup>

|             |           |                                                   |
|-------------|-----------|---------------------------------------------------|
| p75_Nterm   | sense     | 5-CTAGGAATTCGCCACCATGGGGGCAGGTGCCACCGG-3          |
| p75_Cterm   | antisense | 5-CTAGGGGCCCCGCACCGGGGATGTGGCAGTGG-3              |
| C257A/G266I | sense     | 5-ATCCTGGCTGCTGTGGTTGTG <u>ATA</u> CTTGTGGCCTAC-3 |
| C257A/G266I | antisense | 5-AACCACAGCAGC <b>CAG</b> GATGGAGGCATAGACAGGGAT-3 |
| Δ193        | sense     | 5-GAGGCACCTCCAGAAACCACCGACAACCTCATC-3             |
| Δ193        | antisense | 5-GATGAGGTTGTCGGTGGTTTCTGGAGGTGCCTC-3             |
| Δ250        | sense     | 5-AAGAGGTGGAACAGCCTCTACAGCAGCCTGCCC-3             |
| Δ250        | antisense | 5-GGGCAGGCTGCTGTAGAGGCTGTTCCACCTCTT-3             |

1) Underlined sequences are mutated and the bold sequence facilitated selection of mutant but does not alter amino acid sequence.

2) Deletion mutants were created by using p75\_Nterm / antisense mutant primer and p75\_Cterm / sense mutant primer in first PCR reaction to generate two halves of gene. The second PCR reaction used p75\_Nterm / p75\_Cterm with two products of first reaction to create the full length gene with the deletion.

Primers for site-directed mutagenesis & cloning

|             |           |                                            |
|-------------|-----------|--------------------------------------------|
| G247C       | sense     | 5-CGTGGTGACCCGA <u>I</u> GCACCACCGACAAC-3  |
| G247C       | antisense | 5-GTTGTCCGGTGGTGC <u>A</u> TCCGGTCACCACG-3 |
| tandem-EGFP | sense     | 5-CTAGGGTACCGCCACC ATGGTGAGCAAGGGCGAGGA-3  |
| tandem-EGFP | antisense | 5-CTAGGGGCCCCG CTTGTACAGCTCGTCCATGC-3      |

### Supplementary Table II – siRNA sequences used in this study

|                              |                                                                          |
|------------------------------|--------------------------------------------------------------------------|
| control (firefly luciferase) | 5-GAAU <u>A</u> UUGUUGCACGAUUUUU-3<br>3-AAAUCGUGCAACAAU <u>A</u> UUCUU-5 |
| canine galectin-3            | 5-AUACCAAGCUGGAUAAUAAU-3<br>3-AUAUUAUCCAGCUUGGU <u>A</u> UUU-5           |
| canine galectin-4            | 5-GGGACAAGGUGGUGUCAAUU-3<br>3-UUCCUGUCCACCACAAGUU-5                      |
| canine galectin-9            | 5-GGGUCAGAGGAGAGGAAGAUU-3<br>3-UCU <u>U</u> CCUCUCCUCUGACCCUU-5          |

**Supplementary Figure 1. PCH analysis measurements of p75. (A)** PCH analysis measures the variance of fluorescence intensity within a very small confocal volume to determine the average molecular brightness of moving particles. As an example, the variance in intensity of a tetramer of fluorescent molecules moving out of the confocal volume will be ~4x-greater than that of a four-fold higher concentration of monomer, even though the average intensity of the two samples is the same. Figure adapted from <http://research.stowers-institute.org/microscopy/external/technology/PCH/index.html>. **(B)** Wild type and mutant p75 were staged in the TGN of MDCK cells co-expressing the TGN marker GalT-mCherry as described in Methods. The crosshair indicates where PCH measurements were made. Cells with low levels of protein expression were chosen for analysis; therefore images shown are with a pinhole of ~3 airy units (AU) to observe signals visually. All PCH measurements were done with the pinhole set to 1 AU. Scale bar = 10  $\mu\text{m}$ .

Supplemental Fig. 1  
Youker et al.

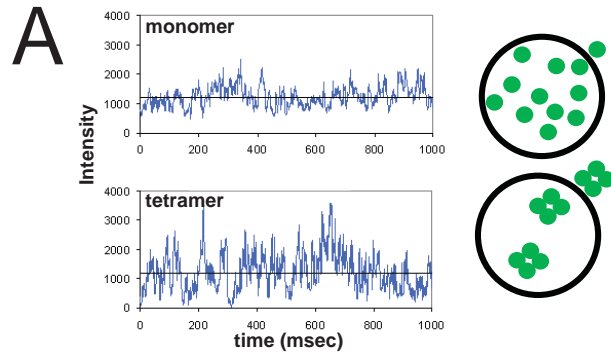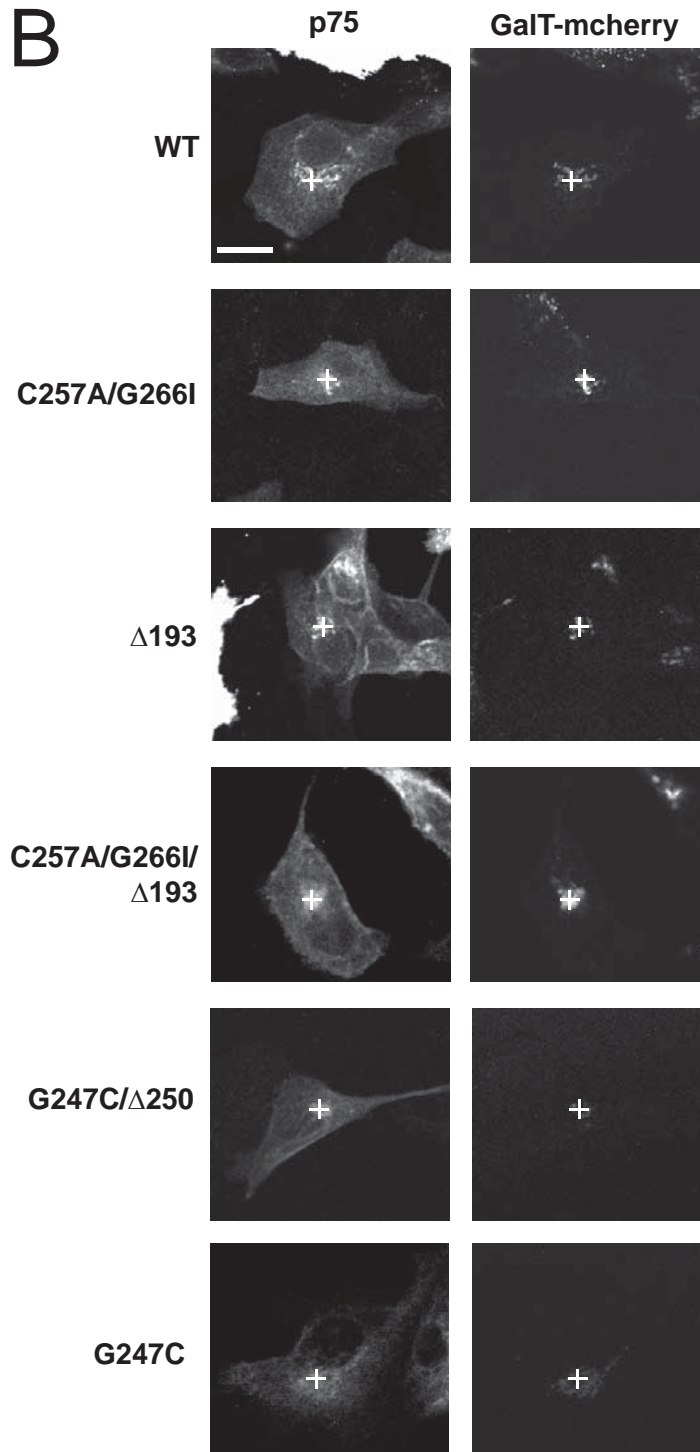

Supplement: supp_E13-02-0078_CombinedSupMats.pdf [file supp_E13-02-0078_CombinedSupMats.pdf]
